# Supplementary material for: Association between Cigarette Smoking and New-Onset Diabetes Mellitus in 78,212 Koreans Using Self-Reported Questionnaire and Urine Cotinine
Source: PubMed Central journal article supplement — Diabetes Metab J. 2019 Nov 1;44(3):426–35. doi: 10.4093/dmj.2019.0068 (PMC7332330; doi:10.4093/dmj.2019.0068), 2019-11-01
Supplement: dmj-44-426-s001.pdf [file dmj-44-426-s001.pdf]

**Supplementary Table 1.** Baseline characteristics according to self-reported smoking status

| Characteristic                     | Self-reported never smokers<br>(n=37,265) | Self-reported former smokers<br>(n=12,499) | Self-reported current smokers<br>(n=17,377) |
|------------------------------------|-------------------------------------------|--------------------------------------------|---------------------------------------------|
| Age, yr                            | 37.2±5.3                                  | 39.5±5.7                                   | 38.8±5.3                                    |
| Male sex                           | 14,084 (37.8)                             | 11,772 (94.2)                              | 16,902 (97.3)                               |
| Body mass index, kg/m <sup>2</sup> | 22.5±3.1                                  | 24.4±2.9                                   | 24.5±3.1                                    |
| Waist circumference, cm            | 79.0±9.0                                  | 85.6±7.9                                   | 86.2±8.2                                    |
| Systolic blood pressure, mm Hg     | 105.5±12.5                                | 114.6±12.0                                 | 113.9±11.7                                  |
| Diastolic blood pressure, mm Hg    | 67.7±9.7                                  | 74.1±9.7                                   | 73.6±9.7                                    |
| Total cholesterol, mmol/L          | 4.9±0.9                                   | 5.2±0.9                                    | 5.2±0.9                                     |
| Triglycerides, mmol/L              | 0.9 (0.7–1.3)                             | 1.3 (0.9–1.8)                              | 1.4 (1.0–2.1)                               |
| LDL-C, mmol/L                      | 3.0±0.8                                   | 3.3±0.8                                    | 3.3±0.8                                     |
| HDL-C mmol/L                       | 1.6±0.4                                   | 1.4±0.3                                    | 1.3±0.3                                     |
| Blood urea nitrogen, mmol/L        | 4.3±1.1                                   | 4.6±1.1                                    | 4.5±1.0                                     |
| Creatinine, μmol/L                 | 72.1±16.3                                 | 86.9±12.4                                  | 86.2±10.9                                   |
| Uric acid, μmol/L                  | 290.5±82.9                                | 360.6±75.7                                 | 362.8±73.5                                  |
| hs-CRP, mg/dL                      | 0.4 (0.2–0.8)                             | 0.5 (0.3–0.9)                              | 0.5 (0.3–1.0)                               |
| Glucose, mmol/L                    | 5.1±0.5                                   | 5.4±0.5                                    | 5.3±0.5                                     |
| HbA1c, % (mmol/mol)                | 5.6±0.3 (37±0.8)                          | 5.6±0.3 (38±0.8)                           | 5.6±0.27 (38±0.8)                           |
| HOMA-IR                            | 1.1 (0.7–1.6)                             | 1.2 (0.8–1.8)                              | 1.2 (0.8–1.8)                               |
| Urinary cotinine, ng/mL            | 0.0 (0.0–0.0)                             | 0.0 (0.0–0.0)                              | 882.0 (335.0–1,528.5)                       |
| Daily alcohol consumption, g/day   | 4.0 (2.0–10.0)                            | 12.0 (6.0–27.0)                            | 15.0 (7.0–35.0)                             |
| Alcohol consumption (≥3 times/wk)  | 2,440/34,448 (7.1)                        | 2,511/12,252 (20.5)                        | 4,264/17,147 (24.9)                         |
| Vigorous exercise (≥5 times/wk)    | 1,342/36,273 (3.7)                        | 502/12,216 (4.1)                           | 456/17,033 (2.7)                            |
| Metabolic syndrome                 | 1,817/30,289 (6.0)                        | 1,398/9,403 (14.9)                         | 2,213/12,669 (17.5)                         |
| Hypertension                       | 1,605/37,195 (4.3)                        | 1,401/12,480 (11.2)                        | 1,567/17,339 (9.0)                          |
| Cotinine-verified smoking status   |                                           |                                            |                                             |
| Current non-smokers                | 36,631 (98.3)                             | 11,621 (93.0)                              | 1,697 (9.8)                                 |
| Current smokers                    | 634 (1.7)                                 | 878 (7.0)                                  | 15,680 (90.2)                               |

Values are presented as mean±standard deviation, number (%), or median (interquartile range). Triglyceride, hs-CRP, cotinine, daily alcohol amount, and HOMA-IR were log-transformed for this analysis. *P* values were based on analysis of variance (ANOVA) *t*-test or chi-square test. *P* value for all variables are <0.001.

LDL-C, low density lipoprotein cholesterol; HDL-C, high density lipoprotein cholesterol; hs-CRP, high-sensitivity C-reactive protein; HbA1c, glycosylated hemoglobin; HOMA-IR, homeostasis model assessment of insulin resistance.
