# Supplementary material for: Association between Cigarette Smoking and New-Onset Diabetes Mellitus in 78,212 Koreans Using Self-Reported Questionnaire and Urine Cotinine
Source: PubMed Central journal article supplement — Diabetes Metab J. 2019 Nov 1;44(3):426–35. doi: 10.4093/dmj.2019.0068 (PMC7332330; doi:10.4093/dmj.2019.0068), 2019-11-01
Supplement: dmj-44-426-s002.pdf [file dmj-44-426-s002.pdf]

**Supplementary Table 2.** Multivariate Cox-hazard regression analyses for association of NODM with baseline cotinine-verified and self-reported smoking status according to sex

| Variable                                       | RR (95% CI)      |                  |
|------------------------------------------------|------------------|------------------|
|                                                | Age adjusted     | Multivariate     |
| <b>Male</b>                                    |                  |                  |
| Urinary cotinine level <sup>a</sup>            | 1.05 (1.03–1.07) | 1.04 (1.01–1.06) |
| Cotinine-verified current smoking <sup>b</sup> | 1.39 (1.22–1.58) | 1.27 (1.07–1.50) |
| Self-reported former smoking <sup>c</sup>      | 1.39 (1.15–1.69) | 1.22 (0.96–1.54) |
| Self-reported current smoking <sup>c</sup>     | 1.65 (1.38–1.96) | 1.35 (1.07–1.68) |
| <b>Female</b>                                  |                  |                  |
| Urinary cotinine level <sup>a</sup>            | 0.99 (0.88–1.11) | 0.93 (0.76–1.14) |
| Cotinine-verified current smoking <sup>b</sup> | 0.95 (0.45–2.02) | 0.52 (0.13–2.10) |
| Self-reported former smoking <sup>c</sup>      | 0.69 (0.22–2.17) | 0.66 (0.16–2.80) |
| Self-reported current smoking <sup>c</sup>     | 0.30 (0.04–2.17) | NA               |

Multivariate model was adjusted for age, sex, waist circumference, body mass index, vigorous exercise ( $\geq 5$  times/week), daily alcohol consumption, systolic blood pressure, blood urea nitrogen, creatinine, glucose, uric acid, low density lipoprotein cholesterol, high density lipoprotein cholesterol, triglyceride, and high-sensitivity C-reactive protein.

NODM, new-onset diabetes mellitus; RR, relative risk; CI, confidence interval; NA, not applicable.

<sup>a</sup>This value was log-transformed for the analysis, <sup>b</sup>Reference group is baseline cotinine-verified current non-smoking, <sup>c</sup>Reference group is baseline self-reported never smoking.
