# Supplementary figures and images for: Association between Cigarette Smoking and New-Onset Diabetes Mellitus in 78,212 Koreans Using Self-Reported Questionnaire and Urine Cotinine
Source: PubMed Central journal article supplement — Diabetes Metab J. 2019 Nov 1;44(3):426–35. doi: 10.4093/dmj.2019.0068 (PMC7332330; doi:10.4093/dmj.2019.0068), 2019-11-01

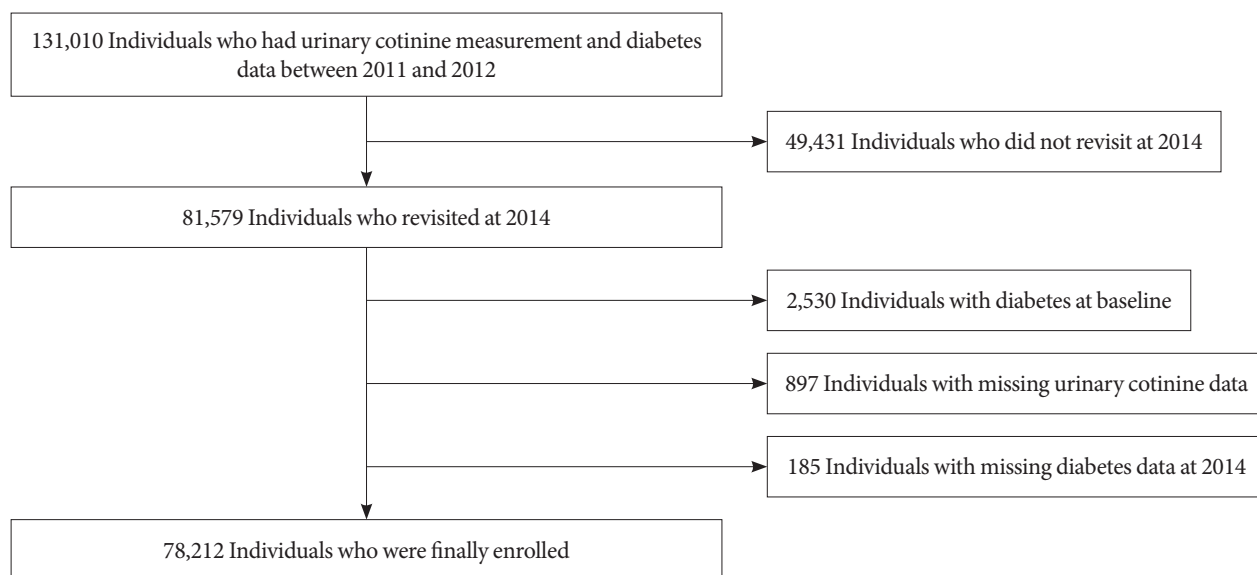

**Supplementary Fig. 1.** Flow chart for sample selection criteria.

Supplement: dmj-44-426-s003.pdf [file dmj-44-426-s003.pdf]
